# Supplementary material
Source: PubMed Central journal article supplement (PMC5378503)
Supplement: supp_5.1.E137_2016-0122-1_at.pdf [file supp_5.1.E137_2016-0122-1_at.pdf]

**Appendix 1 (as supplied by the authors): Suggestions, recommendations, and final decisions of the collected peer feedback**

| Suggested Change                                                       | Collaborative Recommendation | Collaborative GRADE | Final Decision                                                     |
|------------------------------------------------------------------------|------------------------------|---------------------|--------------------------------------------------------------------|
| ASA 81mg should be replace ASA 325 on the list.                        | Strongly for replacement     | High                | ASA 325mg replaced with ASA 81mg.                                  |
| Digoxin should be added to the list.                                   | Weakly against addition      | High                | Digoxin was not added to the list.                                 |
| Enalapril should be replaced with ramipril.                            | Weakly for replacement       | Moderate            | Enalapril was replaced with ramipril.                              |
| Hydrochlorothiazide should be replaced with chlorthalidone.            | Weakly for replacement       | Moderate            | Hydrochlorothiazide was replaced with chlorthalidone.              |
| Labetalol should be replaced with another beta blocker.                | Weakly against replacement   | Low                 | Labetalol was not replaced with another beta blocker.              |
| Losartan should be replaced with candesartan                           | Weakly for replacement       | Very low            | Losartan was replaced with candesartan.                            |
| Nifedipine should be removed from the list                             | Strongly for removal         | High                | Nifedipine was removed from the list.                              |
| The patch route of nitroglycerin should be added to the list.          | Strongly against addition    | Moderate            | The nitroglycerin patch was not added to the list.                 |
| Simvastatin should be replaced with pravastatin.                       | Weakly for replacement       | Moderate            | Simvastatin was replaced with pravastatin.                         |
| Ticagrelor should be removed from the list.                            | Strongly for removal         | Moderate            | Ticagrelor was removed from the list.                              |
| Verapamil should be replaced with diltiazem.                           | Strongly for replacement     | Moderate            | Verapamil was replaced with diltiazem.                             |
| Ciclesonide should be replaced with beclomethasone (nasal inhaler).    | Strongly for replacement     | Low                 | Ciclesonide was replaced with beclomethasone.                      |
| Salmeterol should be replaced with combination salmeterol/fluticasone. | Strongly for replacement     | Moderate            | Salmeterol was replaced with a salmeterol/fluticasone combination. |
| Acyclovir should be replaced with valacyclovir.                        | Weakly for replacement       | Moderate            | Acyclovir was replaced with valacyclovir.                          |
| Erythromycin should be removed from the list.                          | Strongly for removal         | High                | Erythromycin was removed from the list.                            |
| Benzoyl peroxide should be removed from the list.                      | Weakly against removal       | Very low            | Benzoyl peroxide remained on the list.                             |
| Cetirizine should be removed from the list.                            | Weakly against removal       | Low                 | Cetirizine remained on the list.                                   |
| Riveroxaban should be added to the list                                | Weakly for addition          | Low                 | Riveroxaban was added to the list.                                 |
| Ferrous fumarate should be replaced with other ferrous salts.          | Weakly against replacement   | Very low            | Ferrous fumarate remained on the list.                             |
| Timolol should be replaced with latanoprost.                           | Weakly for replacement       | Moderate            | Timolol was replaced with latanoprost.                             |
| Doxazosin should be removed from the list.                             | Weakly for removal           | Moderate            | Doxazosin was removed from the list.                               |
| Sildenafil should be removed from the list.                            | Strongly against removal     | High                | Sildenafil was not removed from the list.                          |
| Diclectin (doxylamine + pyridoxine) should be added to the list.       | Weakly against addition      | High                | Diclectin (doxylamine + pyridoxine) was not added to the list.     |
| Additional prenatal vitamins should be added to the list.              | Strongly against addition    | High                | Prenatal multivitamins were not added to the list.                 |
| Amitriptyline should be replaced with nortriptyline.                   | Weakly for replacement       | Low                 | Amitriptyline was replaced with nortriptyline.                     |
| Atomoxetine should be replaced with methylphenidate.                   | Weakly against replacement   | Moderate            | Atomoxetine was not replaced with methylphenidate.                 |

|                                                                 |                              |          |                                                     |
|-----------------------------------------------------------------|------------------------------|----------|-----------------------------------------------------|
| Chlorpromazine should be removed from the list                  | Strongly for removal         | High     | Chlorpromazine was removed from the list.           |
| Quetiapine should be added to the list.                         | Weakly against addition      | Moderate | Quetiapine was not added to the list.               |
| Clozapine should be added to the list.                          | Weakly for addition          | Moderate | Clozapine was added to the list.                    |
| Diazepam should be added to the list.                           | Weakly for addition          | High     | Diazepam was added to the list.                     |
| Clonazepam should be added to the list.                         | Strongly against addition    | High     | Clonazepam was not added to the list.               |
| Phenytoin should be replaced with lamotrigine or levetiracetam. | Weakly against replacement   | Low      | Phenytoin was not replaced on the list.             |
| Venlafaxine should be added to the list.                        | Weakly against addition      | Moderate | Venlafaxine was not added to the list.              |
| Duloxetine should be added to the list.                         | Strongly against addition    | Moderate | Duloxetine was not added to the list.               |
| Gabapentin should be added to the list.                         | Weakly for addition          | Low      | Gabapentin was added to the list.                   |
| Eletriptan should be replaced with rizatriptan.                 | Strongly against replacement | Moderate | Eletriptan was not replaced with rizatriptan.       |
| Methadone should be added to the list.                          | Weakly for addition          | Moderate | Methadone was added to the list.                    |
| Naltrexone should be added to the list.                         | Weakly for addition          | Moderate | Naltrexone was added to the list.                   |
| Nicotine replacement therapy should be added to the list.       | Strongly for addition        | High     | Nicotine replacement therapy was added to the list. |
| Omeprazole should be removed from the list.                     | Strongly for removal         | Moderate | Omeprazole was removed from the list.               |
| Polyethylene glycol 3350 should be added to the list.           | Weakly for addition          | Moderate | Polyethylene glycol 3350 was added to the list.     |
| Hydromorphone should be added to the list.                      | Weakly for addition          | Low      | Hydromorphone was added to the list.                |
| Ibuprofen should be removed from the list.                      | Weakly against removal       | Moderate | Ibuprofen was not removed from the list.            |
| Dolutegravir should be added to the list.                       | Strongly for addition        | Moderate | Dolutegravir should be added to the list.           |
| Abacavir should be added to the list                            | Strongly for addition        | Moderate | Abacavir should be added to the list                |
| Lamivudine should be added to the list                          | Strongly for addition        | Moderate | Lamivudine should be added to the list              |
