# Supplementary material
Source: PubMed Central journal article supplement (PMC5378503)
Supplement: supp_5.1.E137_2016-0122-2_at.pdf [file supp_5.1.E137_2016-0122-2_at.pdf]

**Appendix 2 (as supplied by the authors): Additions discussed based on frequently prescribed medications in the clinic audits**

| Suggested Change                                                                     | Collaborative Recommendation | Collaborative GRADE | Final Decision                                                                 |
|--------------------------------------------------------------------------------------|------------------------------|---------------------|--------------------------------------------------------------------------------|
| Zopiclone should be added to the list.                                               | Weakly against addition      | Moderate            | Zopiclone was not added to the list.                                           |
| Varenicline should be added to the list.                                             | Strongly for addition        | High                | Varenicline was added to the list.                                             |
| Vitamin B12 should be added to the list.                                             | Strongly for addition        | Moderate            | Vitamin B12 was added to the list.                                             |
| Tretinoin should be added to the list.                                               | Weakly for addition          | Moderate            | Tretinoin should be added to the list.                                         |
| Baclofen should be added to the list.                                                | Weakly for addition          | Low                 | Baclofen was added to the list.                                                |
| Pramoxine/zinc should be added to the list.                                          | Weakly against addition      | Very Low            | Pramoxine/zinc was not added to the list.                                      |
| Benztropine should be added to the list.                                             | Weakly for addition          | Low                 | Benztropine was added to the list.                                             |
| Fusidic acid should be added to the list.                                            | Weakly for addition          | Moderate            | Fusidic acid was added to the list.                                            |
| Mupirocin should be added to the list.                                               | Strongly for addition        | Moderate            | Mupirocin was added to the list.                                               |
| Olopatadine should be added to the list.                                             | Weakly for addition          | Moderate            | Olopatadine was added to the list.                                             |
| Cromolyn should be added to the list.                                                | Weakly against addition      | Moderate            | Cromolyn was not added to the list.                                            |
| Montelukast should be added to the list.                                             | Weakly against addition      | Moderate            | Montelukast was not added to the list.                                         |
| Calcium should be added to the list.                                                 | Weakly against addition      | Moderate            | Calcium was not added to the list.                                             |
| Vaginal ring eluting etonogestrel and ethinyl estradiol should be added to the list. | Weakly for addition          | Moderate            | Vaginal ring eluting etonogestrel and ethinyl estradiol was added to the list. |
| Conjugated estrogens should be added to the list.                                    | Strongly for addition        | Moderate            | Conjugated estrogens were added to the list                                    |
| Estradiol (17 $\beta$ ) should be added to the list.                                 | Weakly for addition          | Moderate            | Estradiol (17 $\beta$ ) was added to the list.                                 |
