# Supplementary material
Source: PubMed Central journal article supplement (PMC5378503)
Supplement: supp_5.1.E137_2016-0122-5_at.pdf [file supp_5.1.E137_2016-0122-5_at.pdf]

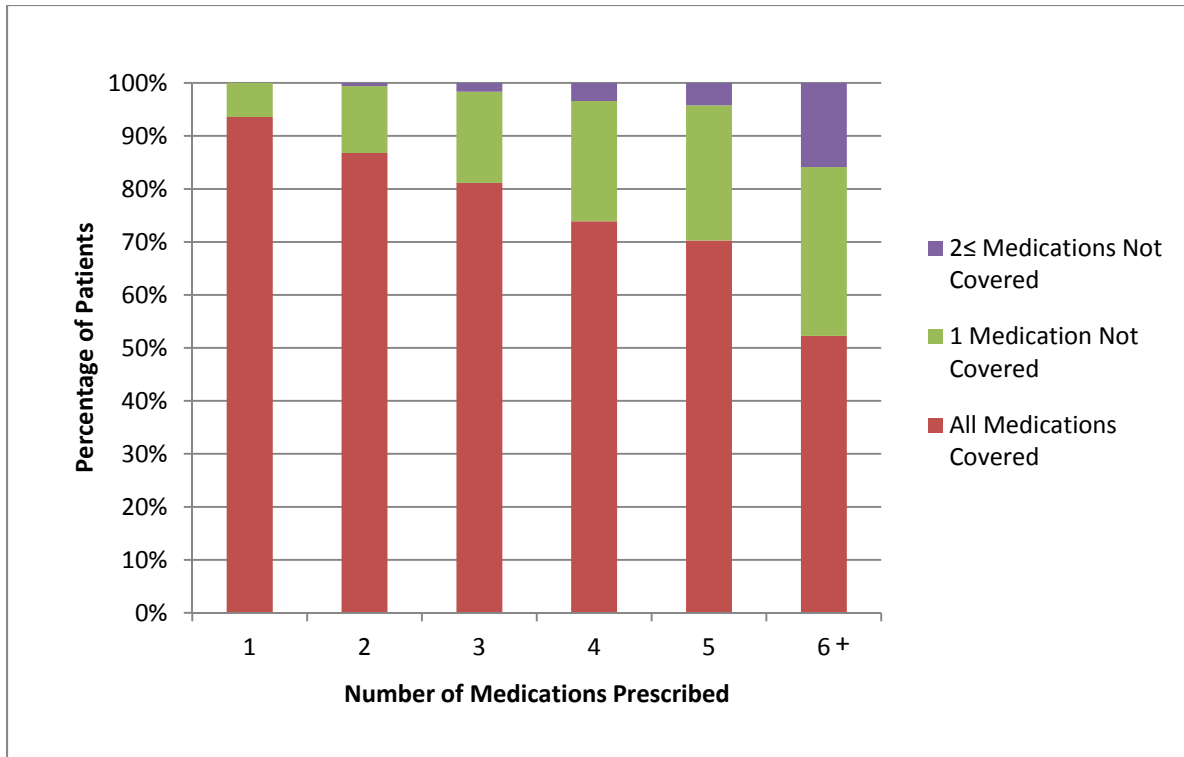

**Appendix 5 (as supplied by the authors): Coverage of the essential medicines list at the North York Family Health Team stratified by the number of prescriptions received by each patient**
